# Supplementary material
Source: PubMed Central journal article supplement (PMC9982744)
Supplement: jamaoncol-e227762-s002.pdf [file jamaoncol-e227762-s002.pdf]

## Data Sharing Statement

Riaz. First-Line Systemic Treatment Options for Metastatic Castration-Sensitive Prostate Cancer. *JAMA Oncol.* Published March 02, 2023. doi:10.1001/jamaoncol.2022.7762

### Data

**Data available:** No

### Additional Information

**Explanation for why data not available:** Published data from clinical trials were used in the analyses which will be made available upon a written request to the corresponding author.
